# Supplementary material
Source: Research Square preprint supplement (doi:10.21203/rs.3.rs-8629821/v1)
Supplement: Supplementary file 1 [file 2c17dcccd29c3a4ffae61714.docx]

**Interview Guide**

**Section I: Introduction**

1. Briefly introduce the study, its purpose, and the importance of understanding identity politics and inter-ethnic relations.
2. Obtain verbal consent to participate in the interview and assure confidentiality.

**Section II: Questions**

**Objective 1: To investigate the micro-level dynamics of conflicts between the Sidama and Guji communities.**

1. How would you describe the current peace situation in your kebele?
2. What are the common causes of conflicts between the Sidama and Guji communities?
3. How do these conflicts typically begin and escalate?
4. Can you share specific examples of recent conflicts and how they were addressed?

**Objective 2: To explore how identity politics influences inter-ethnic relations.**

1. Do you believe identity politics influences relationships between the Sidama and Guji communities?
   - If yes, in what ways does it shape these relationships?
2. How do cultural, linguistic, or historical differences impact interactions between the two communities?
3. Are there instances where identity politics has either improved or worsened inter-ethnic relations?
4. How do political leaders or local administrators influence these dynamics?

**Objective 3: To evaluate the effectiveness of existing peace-building initiatives in managing conflicts and tensions.**

1. What peace-building initiatives have been implemented in your area to address conflicts?
2. Were these initiatives inclusive and participatory? Please explain.
3. How do you assess the effectiveness of these initiatives in reducing tension and promoting harmony?
4. What gaps or weaknesses do you observe in these peace-building efforts?

**Objective 4: To assess the challenges and opportunities for achieving sustainable conflict resolution.**

1. What challenges have you encountered when implementing indigenous conflict resolution mechanisms?
2. Are there any barriers to maintaining and replicating best practices for conflict resolution?
3. In your opinion, what are the main obstacles to achieving sustainable conflict resolution in this area?
4. What opportunities or strengths exist to promote sustainable peace between the Sidama and Guji communities?

**Closing**

1. Do you have any suggestions for improving peace-building and conflict resolution mechanisms?
2. Is there anything else you would like to share about identity politics, inter-ethnic relations, or peace-building?

**Focus Group Discussion (FGD) Guide**

**Introduction**

1. Welcome participants and explain the purpose of the discussion.
2. Emphasize the importance of every participant's opinion and maintain confidentiality.
3. Obtain verbal consent and outline the discussion flow.

**Discussion Questions**

**Objective 1: Conflict Dynamics**

1. What are the most common triggers of conflicts between the Sidama and Guji communities in this area?
2. How do these conflicts affect daily life and relationships in the community?
3. Are there specific groups (e.g., youth, elders, women) more involved in or impacted by these conflicts?

**Objective 2: Identity Politics**

1. In what ways do you think identity politics shapes inter-ethnic interactions?
2. Are there specific examples where political identity has contributed to conflict or reconciliation?
3. How does the community perceive the role of ethnic identity in fostering unity versus division?

**Objective 3: Peace-Building Initiatives**

1. What peace-building efforts have been most effective in this area?
2. How have these initiatives included diverse voices (e.g., youth, elders, women)?
3. What recommendations would you make to strengthen these efforts?

**Objective 4: Challenges and Opportunities**

1. What are the key challenges you face in sustaining peace and resolving conflicts?
2. What opportunities exist for creating long-lasting peace between the two communities?
3. Are there practices from other communities or regions that could be adapted to this context?

**Closing**

1. Summarize key points discussed and confirm agreement on major insights.
2. Thank participants for their contributions and encourage them to share any final thoughts.
